# Interobserver Reliability of Glasgow Coma Scale Scores for Intensive Care Unit Patients

Ayda Kebapçı, PhD, RN  
Gül Dikeç, PhD, RN  
Serpil Topçu, PhD, RN

**BACKGROUND** Intensive care units frequently use the Glasgow Coma Scale to objectively assess patients' levels of consciousness. Interobserver reliability of Glasgow Coma Scale scores is critical in determining the degree of impairment.

**OBJECTIVE** To evaluate interobserver reliability of intensive care unit patients' Glasgow Coma Scale scores.

**METHODS** This prospective observational study evaluated Glasgow Coma Scale scoring agreement among 21 intensive care unit nurses and 2 independent researchers who assessed 202 patients with neurosurgical or neurological diseases. Each assessment was completed independently and within 1 minute. Participants had no knowledge of the others' assessments.

**RESULTS** Agreement between Glasgow Coma Scale component and sum scores recorded by the 2 researchers ranged from 89.5% to 95.9% ( $P = .001$ ). Significant agreement among nurses and the 2 researchers was found for eye response (73.8%), motor response (75.0%), verbal response (68.1%), and sum scores (62.4%) (all  $P = .001$ ). Significant agreement among nurses and the 2 researchers (55.2%) was also found for sum scores of patients with sum scores of 10 or less ( $P = .03$ ).

**CONCLUSIONS** Although the study showed near-perfect agreement between the 2 researchers' Glasgow Coma Scale scores, agreement among nurses and the 2 researchers was moderate (not near perfect) for sub-component and sum scores. Accurate Glasgow Coma Scale evaluation requires that intensive care unit nurses have adequate knowledge and skills. Educational strategies such as simulations or orientation practice with a preceptor nurse can help develop such skills. (*Critical Care Nurse*. 2020;40[4]:e18-e26)

**F**or the last 40 years, the Glasgow Coma Scale (GCS) has been used worldwide, especially in emergency care and intensive care units (ICUs), to assess patients' levels of consciousness.<sup>1</sup> The GCS consists of 3 subscales: eye response (scored 1-4), motor response (scored 1-6), and verbal response (scored 1-5). The GCS sum score determines the patient's level of consciousness.<sup>2</sup> Because it indicates patient outcome, it plays a significant role in efficient and accurate patient assessment and is essential in planning best treatment modalities and patient care.<sup>3,4</sup> However, many factors influence the reliability of GCS evaluations.<sup>3</sup>

The GCS is a validated and universal scale used to evaluate patients' level of consciousness. Variability in interobserver reliability results, however, have led to doubts about the success of the scale.<sup>5,6</sup> Previous studies have assessed the interobserver reliability of GCS scores among health care providers.<sup>3-5,7,8</sup> A video-based study reported GCS score accuracy rates of 29% and 33.1% among nurses and other health care providers, respectively. The study also found that nurses had the lowest GCS scoring accuracy rate.<sup>3</sup> A randomized controlled trial determined that GCS sum scores were statistically more accurate when health care providers evaluated scores while holding a GCS reference card.<sup>4</sup> In some studies, emergency department health care providers scored eye, verbal, and motor responses most accurately.<sup>3,5</sup> Gill et al,<sup>5</sup> however, found that only 32% of health care providers agreed on the GCS scores of adult patients.

The literature shows that GCS assessment standardization, in addition to knowledge and education, is extremely important in ensuring assessment accuracy.<sup>9,10</sup> Most studies of interobserver reliability among health care providers have used simulated patients or taken place in emergency departments. Patients in ICUs require rapid and objective assessment of level of consciousness. The level of consciousness, especially in patients with neurological or neurosurgical diseases, may change within minutes of arrival in the ICU. To prevent irreversible damage in patients, ICU nurses must be able to accurately assess each patient's level of consciousness so the health care team can make decisions about necessary treatment and interventions without wasting time. An early and accurate assessment of a patient's GCS score is essential for planning and implementing effective patient care and achieving targeted patient outcomes.<sup>6</sup>

## Authors

*Ayda Kebabçı is an assistant professor and Serpil Topçu is a lecturer in the Faculty of Nursing, Koç University, Istanbul, Turkey.*

*Gül Dikeç is an assistant professor in the Department of Psychiatric Nursing, Faculty of Nursing, University of Health Sciences, Istanbul.*

*Corresponding author: Gül Dikeç, PhD, RN, Department of Psychiatric Nursing, Hamidiye Faculty of Nursing, University of Health Sciences, Selimiye Neighborhoods, Tıbbiye Street No. 38 34668 Üsküdar, Istanbul, Turkey (email: gul.dikec@sbu.edu.tr).*

*To purchase electronic or print reprints, contact the American Association of Critical-Care Nurses, 27071 Aliso Creek Rd, Aliso Viejo, CA 92656. Phone, (800) 899-1712 or (949) 362-2050 (ext 532); fax, (949) 362-2049; email, reprints@aacn.org.*

Many reliability studies of the GCS in critical care nursing conducted in the 1990s found a gap between clinical practice and knowledge and suggested additional training for nurses. However, the wording of the scale was changed in 2014, so reevaluating ICU nurses' accuracy in GCS evaluation was necessary. Few prospective observational studies of ICU nurses' accuracy with the revised GCS have been conducted, especially in real patients. Therefore, the aim of this study was to evaluate interobserver reliability of the GCS.

## Methods

### Study Design and Participants

This prospective observational study evaluated GCS scoring agreement among ICU nurses. We designed the study according to the Strengthening the Reporting of Observational Studies in Epidemiology tool.<sup>11</sup>

The study was conducted from November 2017 through February 2018 in an 18-bed medical-surgical ICU in which 35 nurses work in 2 shifts. We used a convenience sample of 21 nurses from the day shift. Inclusion criteria for nurses were having graduated from nursing school at least 6 months before the study and agreeing to participate. Demographic information included education level, professional experience, academic background, and postgraduate qualifications in critical care.

Patients' GCS scores were recorded by each patient's primary nurse and by 2 independent researchers. Both researchers had at least 3 years of experience working as an ICU nurse and had been working as instructors for 8 years. Both researchers had conducted ICU nursing lectures in an undergraduate nursing program and a postgraduate critical care nursing certification program.

Patients participating in the study were selected according to their diagnoses. Patients with altered levels of consciousness were included. Patients included were over 18 years of age, had undergone neurosurgery, or had neurological diseases that led to changes in their GCS scores and admission to the ICU. Patients who received paralytic agents or had a Richmond Agitation-Sedation

**GCS is a universal scale used to evaluate patients' level of consciousness; however, studies have raised doubts about the interobserver reliability of GCS.**

Scale score of -4 (deep sedation) or -5 (unarousable level of sedation) were excluded.

### Data Collection

Participating researchers designed the data collection form used in the study. Participating nurses' experience levels and patients' medical diagnoses were recorded. Each patient's primary ICU nurse and the 2 additional researchers were given 1 minute to independently record the patient's total GCS score and the eye, verbal, and motor subcomponent scores. Because significant changes in the patient's GCS score might occur during observations, each observation was not allowed to exceed 5 minutes. The study's researchers did not train participating nurses in GCS evaluation. Nurses were given GCS scoring reference cards, with real-time use being optional. Some nurses scored patients' GCS without using the card. This method allowed both nurses who were and those who were not able to memorize the GCS to participate. Eye, motor, and verbal responses, as well as total GCS scores, were recorded after each evaluation. The nurses and 2 researchers returned their individually completed forms while remaining blind to each other's assessments.

For patients unable to respond to verbal stimuli or follow simple commands, the researchers administered an appropriate painful stimulus to observe motor response.<sup>1</sup> Intubated patients were assigned a "T," as suggested by Teasdale et al.<sup>1</sup>

### Ethical Considerations

The institutional review board the study institution approved the study (2017.228.IRB2.068), and the hospital approved the study protocol. Written and oral consent was obtained from each registered nurse and patient or, for patients with altered levels of consciousness, the next of kin.

### Data Analysis

Data were processed with NCSS statistical software (NCSS, LLC). We used the Krippendorff  $\alpha$  statistic to assess interrater agreement among researchers and nurses making clinical decisions about the GCS. Krippendorff  $\alpha$  values of 0.20 or lower were considered poor agreement; from 0.21 to 0.40, fair agreement; from 0.41 to 0.60, moderate agreement; from 0.61 to 0.80, substantial agreement; and from 0.80 to 1.00, near-perfect agreement. We used descriptive statistics (percentages, means, SDs, and ranges) to determine total GCS and

**Table 1** Characteristics of patients and ICU nurses

| Characteristic                 | No. (%) <sup>a</sup> |
|--------------------------------|----------------------|
| <b>Patients (N=20)</b>         |                      |
| Age, y, mean (range)           | 62 (29-88)           |
| Female sex                     | 117 (57.9)           |
| Intubated                      | 136 (67.5)           |
| Not intubated                  | 66 (32.5)            |
| Diagnosis                      |                      |
| Brain tumor                    | 36 (17.8)            |
| Hydrocephalus                  | 20 (9.9)             |
| Intracerebral hematoma         | 14 (6.9)             |
| Confusion                      | 15 (7.4)             |
| Lumber stabilization           | 3 (1.5)              |
| Myasthenia gravis              | 13 (6.4)             |
| After cardiac arrest           | 32 (15.8)            |
| Subarachnoid hemorrhage        | 66 (32.7)            |
| Trigeminal neuralgia           | 3 (1.5)              |
| <b>Nurses (N=21)</b>           |                      |
| Experience in the study ICU, y |                      |
| 1-2                            | 17 (81)              |
| 3-5                            | 3 (14)               |
| 6-10                           | 0                    |
| ≥ 10                           | 1 (5)                |
| Total ICU experience, y        |                      |
| 1-2                            | 7 (33)               |
| 3-5                            | 10 (48)              |
| 6-10                           | 3 (14)               |
| ≥ 10                           | 1 (5)                |

Abbreviation: ICU, intensive care unit.

<sup>a</sup> Unless otherwise indicated.

subcomponent scores. *P* values of less than .01 were considered significant.<sup>1</sup>

### Results

Twenty-one ICU nurses took part in the study. Most had been working in the ICU in which the study was conducted for 1 to 2 years, and almost half had 3 to 5 years of ICU nursing experience. Only 2 nurses (10%) had critical care certification. The 21 ICU nurses and 2 researchers completed a total of 202 GCS observations. The most common patient diagnoses were subarachnoid hemorrhage and brain tumor (Table 1).

In eye response scores, we found significant agreement between ICU nurses and the first researcher (64.1%), between ICU nurses and the second researcher (62.9%), between the 2 researchers (94.6%), and between ICU nurses, the first researcher, and the second researcher (73.8%; Table 2). To evaluate motor response, both researchers used the pain stimulation sites (nail bed,

**Table 2** Agreement levels for GCS subcomponents scores and sum scores

**Eye response<sup>a</sup>**

|              |                  | ICU nurses      |                  |                  |           |                |  |
|--------------|------------------|-----------------|------------------|------------------|-----------|----------------|--|
| Researcher 1 | None             | To pressure     | To sound         | Spontaneous      | Total     | K, P           |  |
| None         | <b>50 (24.8)</b> | 12 (5.9)        | 0 (0)            | 2 (1.0)          | 64 (31.7) | 0.641,<br>.001 |  |
| To pressure  | 4 (2.0)          | <b>16 (7.9)</b> | 5 (2.5)          | 6 (3.0)          | 31 (15.3) |                |  |
| To sound     | 4 (2.0)          | 4 (2.0)         | <b>27 (13.4)</b> | 3 (1.5)          | 38 (18.8) |                |  |
| Spontaneous  | 0 (0)            | 1 (0.5)         | 12 (5.9)         | <b>56 (27.7)</b> | 69 (34.2) |                |  |
| Total        | 58 (28.7)        | 33 (16.3)       | 44 (21.8)        | 67 (33.2)        | 202 (100) |                |  |

|              |                  | ICU nurses      |                  |                  |           |                |  |
|--------------|------------------|-----------------|------------------|------------------|-----------|----------------|--|
| Researcher 2 | None             | To pressure     | To sound         | Spontaneous      | Total     | K, P           |  |
| None         | <b>50 (24.8)</b> | 12 (5.9)        | 0 (0)            | 2 (1.0)          | 64 (31.7) | 0.629,<br>.001 |  |
| To pressure  | 4 (2.0)          | <b>16 (7.9)</b> | 5 (2.5)          | 6 (3.0)          | 31 (15.3) |                |  |
| To sound     | 4 (2.0)          | 4 (2.0)         | <b>28 (13.9)</b> | 6 (3.0)          | 42 (20.8) |                |  |
| Spontaneous  | 0 (0)            | 1 (0.5)         | 11 (5.4)         | <b>53 (26.2)</b> | 65 (32.2) |                |  |
| Total        | 58 (28.7)        | 33 (16.3)       | 44 (21.8)        | 67 (33.2)        | 202 (100) |                |  |

|              |                  | Researcher 1     |                  |                  |           |                |  |
|--------------|------------------|------------------|------------------|------------------|-----------|----------------|--|
| Researcher 2 | None             | To pressure      | To sound         | Spontaneous      | Total     | K, P           |  |
| None         | <b>63 (31.2)</b> | 1 (0.5)          | 0 (0)            | 0 (0)            | 64 (31.7) | 0.946,<br>.001 |  |
| To pressure  | 1 (0.5)          | <b>30 (14.9)</b> | 0 (0)            | 0 (0)            | 31 (15.3) |                |  |
| To sound     | 0 (0)            | 0 (0)            | <b>37 (18.3)</b> | 5 (2.5)          | 42 (20.8) |                |  |
| Spontaneous  | 0 (0)            | 0 (0)            | 1 (0.5)          | <b>64 (31.7)</b> | 65 (32.2) |                |  |
| Total        | 64 (31.7)        | 31 (15.3)        | 38 (18.8)        | 69 (34.2)        | 202 (100) |                |  |

ICU nurses, researcher 1, and researcher 2

K=0.738, P=.001

**Motor response<sup>a</sup>**

|                  |                  | ICU nurses     |                  |                  |                |                  |           |                |  |
|------------------|------------------|----------------|------------------|------------------|----------------|------------------|-----------|----------------|--|
| Researcher 1     | None             | Extension      | Abnormal flexion | Normal flexion   | Localizing     | Obey commands    | Total     | K, P           |  |
| None             | <b>52 (25.7)</b> | 3 (1.5)        | 1 (0.5)          | 5 (2.5)          | 8 (4.0)        | 0 (0)            | 69 (34.2) | 0.649,<br>.001 |  |
| Extension        | 4 (2)            | <b>7 (3.5)</b> | 1 (0.5)          | 4 (2.0)          | 0 (0)          | 0 (0)            | 16 (7.9)  |                |  |
| Abnormal flexion | 0 (0)            | 0 (0)          | <b>0 (0)</b>     | 0 (0)            | 0 (0)          | 0 (0)            | 0 (0)     |                |  |
| Normal flexion   | 1 (0.5)          | 3 (1.5)        | 3 (1.5)          | <b>27 (13.4)</b> | 4 (2.0)        | 0 (0)            | 38 (18.8) |                |  |
| Localizing       | 0 (0)            | 0 (0)          | 0 (0)            | 2 (1.0)          | <b>1 (0.5)</b> | 0 (0)            | 3 (1.5)   |                |  |
| Obey commands    | 1(0.5)           | 0 (0)          | 0 (0)            | 9 (4.5)          | 3 (1.5)        | <b>63 (31.2)</b> | 76 (37.6) |                |  |
| Total            | 58 (28.7)        | 13 (6.4)       | 5 (2.5)          | 47 (23.3)        | 16 (7.9)       | 63 (31.2)        | 202 (100) |                |  |

|                  |                  | ICU nurses     |                  |                  |                |                  |           |                |  |
|------------------|------------------|----------------|------------------|------------------|----------------|------------------|-----------|----------------|--|
| Researcher 2     | None             | Extension      | Abnormal flexion | Normal flexion   | Localizing     | Obey commands    | Total     | K, P           |  |
| None             | <b>55 (27.2)</b> | 3 (1.5)        | 1 (0.5)          | 5 (2.5)          | 8 (4.0)        | 0 (0)            | 72 (35.6) | 0.666,<br>.001 |  |
| Extension        | 0 (0)            | <b>6 (3.0)</b> | 1 (0.5)          | 2 (1)            | 0 (0)          | 0 (0)            | 9 (4.5)   |                |  |
| Abnormal flexion | 0 (0)            | 0 (0)          | <b>0 (0)</b>     | 0 (0)            | 0 (0)          | 0 (0)            | 0 (0)     |                |  |
| Normal flexion   | 2 (1)            | 4 (2.0)        | 3 (1.5)          | <b>28 (13.9)</b> | 4 (2.0)        | 0 (0)            | 41 (20.3) |                |  |
| Localizing       | 0 (0)            | 0 (0)          | 0 (0)            | 3 (1.5)          | <b>1 (0.5)</b> | 0 (0)            | 4 (2)     |                |  |
| Obey commands    | 1 (0.5)          | 0 (0)          | 0 (0)            | 9 (4.5)          | 3 (1.5)        | <b>63 (31.2)</b> | 76 (37.6) |                |  |
| Total            | 58 (28.7)        | 13 (6.4)       | 5 (2.5)          | 47 (23.3)        | 16 (7.9)       | 63 (31.2)        | 202 (100) |                |  |

|                  |                  | Researcher 1   |                  |                  |                |                  |           |                |  |
|------------------|------------------|----------------|------------------|------------------|----------------|------------------|-----------|----------------|--|
| Researcher 2     | None             | Extension      | Abnormal flexion | Normal flexion   | Localizing     | Obey commands    | Total     | K, P           |  |
| None             | <b>69 (34.2)</b> | 3 (1.5)        | 0 (0)            | 0 (0)            | 0 (0)          | 0 (0)            | 72 (35.6) | 0.943,<br>.001 |  |
| Extension        | 0 (0)            | <b>9 (4.5)</b> | 0 (0)            | 0 (0)            | 0 (0)          | 0 (0)            | 9 (4.5)   |                |  |
| Abnormal flexion | 0 (0)            | 0 (0)          | <b>0 (0)</b>     | 0 (0)            | 0 (0)          | 0 (0)            | 0 (0)     |                |  |
| Normal flexion   | 0 (0)            | 4 (2)          | 0 (0)            | <b>37 (18.3)</b> | 0 (0)          | 0 (0)            | 41 (20.3) |                |  |
| Localizing       | 0 (0)            | 0 (0)          | 0 (0)            | 1 (0.5)          | <b>3 (1.5)</b> | 0 (0)            | 4 (2)     |                |  |
| Obey commands    | 0 (0)            | 0 (0)          | 0 (0)            | 0 (0)            | 0 (0)          | <b>76 (37.6)</b> | 76 (37.6) |                |  |
| Total            | 69 (34.2)        | 16 (7.9)       | 0 (0)            | 38 (18.8)        | 3 (1.5)        | 76 (37.6)        | 202 (100) |                |  |

ICU nurses, researcher 1, and researcher 2

K=0.750, P=.001

Continued

**Table 2** Continued**Verbal response<sup>a</sup>**

|              |  | ICU nurses      |              |              |              |                 |                  | Total      | K, <i>P</i>    |
|--------------|--|-----------------|--------------|--------------|--------------|-----------------|------------------|------------|----------------|
| Researcher 1 |  | Intubated       | None         | Sounds       | Words        | Confused        | Orientated       |            |                |
| Intubated    |  | <b>105 (52)</b> | 34 (16.8)    | 0 (0)        | 0 (0)        | 0 (0)           | 0 (0)            | 139 (68.8) | 0.552,<br>.001 |
| None         |  | 0 (0)           | <b>4 (2)</b> | 0 (0)        | 0 (0)        | 0 (0)           | 0 (0)            | 4 (2)      |                |
| Sounds       |  | 0 (0)           | 0 (0)        | <b>0 (0)</b> | 1 (0.5)      | 1 (0.5)         | 0 (0)            | 2 (1)      |                |
| Words        |  | 0 (0)           | 0 (0)        | 0 (0)        | <b>0 (0)</b> | 1 (0.5)         | 0 (0)            | 1 (0.5)    |                |
| Confused     |  | 0 (0)           | 0 (0)        | 0 (0)        | 0 (0)        | <b>14 (6.9)</b> | 8 (4)            | 22 (10.9)  |                |
| Orientated   |  | 4 (2)           | 0 (0)        | 2 (1)        | 0 (0)        | 1 (0.5)         | <b>27 (13.4)</b> | 34 (16.8)  |                |
| Total        |  | 109 (54)        | 38 (18.8)    | 2 (1)        | 1 (0.5)      | 17 (8.4)        | 35 (17.3)        | 202 (100)  |                |

  

|              |  | ICU nurses      |              |              |              |                 |                  | Total      | K, <i>P</i>    |
|--------------|--|-----------------|--------------|--------------|--------------|-----------------|------------------|------------|----------------|
| Researcher 2 |  | Intubated       | None         | Sounds       | Words        | Confused        | Orientated       |            |                |
| Intubated    |  | <b>105 (52)</b> | 34 (16.8)    | 0 (0)        | 0 (0)        | 0 (0)           | 0 (0)            | 139 (68.8) | 0.569,<br>.001 |
| None         |  | 0 (0)           | <b>4 (2)</b> | 0 (0)        | 0 (0)        | 0 (0)           | 0 (0)            | 4 (2)      |                |
| Sounds       |  | 0 (0)           | 0 (0)        | <b>0 (0)</b> | 1 (0.5)      | 0 (0)           | 0 (0)            | 1 (0.5)    |                |
| Words        |  | 0 (0)           | 0 (0)        | 0 (0)        | <b>0 (0)</b> | 0 (0)           | 0 (0)            | 0 (0)      |                |
| Confused     |  | 0 (0)           | 0 (0)        | 0 (0)        | 0 (0)        | <b>17 (8.4)</b> | 9 (4.5)          | 26 (12.9)  |                |
| Orientated   |  | 4 (2)           | 0 (0)        | 2 (1)        | 0 (0)        | 0 (0)           | <b>26 (12.9)</b> | 32 (15.8)  |                |
| Total        |  | 109 (54)        | 38 (18.8)    | 2 (1)        | 1 (0.5)      | 17 (8.4)        | 35 (17.3)        | 202 (100)  |                |

  

|              |  | Researcher 1      |              |                |              |                  |                  | Total      | K, <i>P</i>    |
|--------------|--|-------------------|--------------|----------------|--------------|------------------|------------------|------------|----------------|
| Researcher 2 |  | Intubated         | None         | Sounds         | Words        | Confused         | Orientated       |            |                |
| Intubated    |  | <b>139 (68.8)</b> | 0 (0)        | 0 (0)          | 0 (0)        | 0 (0)            | 0 (0)            | 139 (68.8) | 0.959,<br>.001 |
| None         |  | 0 (0)             | <b>4 (2)</b> | 0 (0)          | 0 (0)        | 0 (0)            | 0 (0)            | 4 (2)      |                |
| Sounds       |  | 0 (0)             | 0 (0)        | <b>1 (0.5)</b> | 0 (0)        | 0 (0)            | 0 (0)            | 1 (0.5)    |                |
| Words        |  | 0 (0)             | 0 (0)        | 0 (0)          | <b>0 (0)</b> | 0 (0)            | 0 (0)            | 0 (0)      |                |
| Confused     |  | 0 (0)             | 0 (0)        | 1 (0.5)        | 1 (0.5)      | <b>22 (10.9)</b> | 2 (1)            | 26 (12.9)  |                |
| Orientated   |  | 0 (0)             | 0 (0)        | 0 (0)          | 0 (0)        | 0 (0)            | <b>32 (15.8)</b> | 32 (15.8)  |                |
| Total        |  | 139 (68.8)        | 4 (2)        | 2 (1)          | 1 (0.5)      | 22 (10.9)        | 34 (16.8)        | 202 (100)  |                |

ICU nurses, researcher 1, and researcher 2

K=0.681, *P*=.001**GCS sum score**

|                                            | Median (range) | Mean (SD)   |
|--------------------------------------------|----------------|-------------|
| ICU nurses                                 | 7 (2-15)       | 7.71 (4.46) |
| Researcher 1                               | 5 (2-15)       | 7.47 (4.80) |
| Researcher 2                               | 6 (2-15)       | 7.49 (4.80) |
|                                            | K              | P           |
| ICU nurses and researcher 1                | 0.491          | .001        |
| ICU nurses and researcher 2                | 0.490          | .001        |
| Researcher 1 and researcher 2              | 0.895          | .001        |
| ICU nurses, researcher 1, and researcher 2 | 0.624          | .001        |

**Patients with GCS sum score ≤10**

|                                            | Median (range) | Mean (SD)   |
|--------------------------------------------|----------------|-------------|
| ICU nurses                                 | 5 (2-10)       | 5.18 (2.34) |
| Researcher 1                               | 4 (2-10)       | 4.67 (2.44) |
| Researcher 2                               | 5 (2-10)       | 4.68 (2.41) |
|                                            | K              | P           |
| ICU nurses, researcher 1, and researcher 2 | 0.552          | .03         |

Abbreviations: GCS, Glasgow Coma Scale; ICU, intensive care unit; K, Krippendorff  $\alpha$ .<sup>a</sup> Score data are presented as No. (%) of 202 patients.

trapezius, and supraorbital site) recommended by Teasdale.<sup>1</sup> At the end of each evaluation, nurses specified their preferred sites of pain stimulation. The most preferred sites were nail bed, trapezius, nipple, sole of the foot, earlobe, and supraorbital site. In motor response scores, we found significant agreement between ICU nurses and the first researcher (64.9%), between ICU nurses and the second researcher (66.6%), between the 2 researchers (94.3%), and among all 3 observers (75.0%; Table 2).

In verbal response scores, we found significant agreement between nurses and the first researcher (55.2%), between nurses and the second researcher (56.9%), between the 2 researchers (95.9%), and among all 3 observers (68.1%; Table 2). We also determined that 16.3% of the nurses recorded the verbal responses of intubated patients as “none.”

In GCS sum scores, we found significant agreement between ICU nurses and the first researcher (49.1%), between ICU nurses and the second researcher (49.0%), between the 2 researchers (89.5%), and among all 3 observers (62.4%). We also found moderate agreement among the 3 observers for patients with GCS sum scores of 10 or less (Table 2).

## Discussion

The 2 researchers’ eye, motor, verbal, and sum GCS scores, which were based on evaluation of patients’ clinical manifestations, were in near-perfect agreement. We believe that the factors that enabled this near-perfect level of interrater reliability between the researchers could be used to improve the standardization and accuracy of GCS scoring. These factors include knowledge of current theory and practice, agreement on appropriate sites for pain stimulation, use of the proper amount of time to accurately evaluate the GCS, an understanding of the importance of GCS assessment, and previous experience in using the GCS for patients with altered levels of consciousness.

Although agreement between the 2 researchers was nearly perfect, we found only moderate agreement in GCS sum scores and all subcomponents among all 3 observers (ICU nurses and the 2 researchers). Because interobserver reliability for GCS sum scores and each subcomponent may be affected by different factors, we discuss agreement levels and their rationales separately.

## Eye Response

The eye response component of the GCS is limited to the opening or closing of the eye in response to stimuli. Eye response is therefore not considered a reliable indicator of consciousness because arousal does not equate to consciousness.<sup>12,13</sup> Holdgate et al<sup>6</sup> found intermediate agreement in eye response scores, with lower agreement among less experienced nurses. Heron et al<sup>7</sup> found the highest levels of interrater reliability for eye response scores. A study by Jaddoua et al<sup>14</sup> found that 55% of nurses in neurosurgical wards did not know that the eye response component ranges from 1 to 4, indicating that nurses have inadequate knowledge of GCS eye response scoring. Similarly, Waterhouse<sup>15</sup> reported that 38% of nurses identified eye response accurately. Our study found sufficient (not near-perfect) interobserver agreement in eye response scores among nurses and the 2 researchers, demonstrating that GCS sum scores may be affected by inaccurate eye scoring, which in turn could affect nursing interventions and patient prognosis.

## Motor Response

Published studies have reported varying results for motor response assessments. Heron et al<sup>7</sup> found the lowest interrater reliability in the motor component, which affected overall score accuracy. Their results are consistent with those of previous studies demonstrating that regardless of the site of stimulation, raters experienced confusion because of localization differences, abnormal flexion, and extension response, all of which are major sources of interrater disagreement.<sup>15,16</sup> Teasdale et al<sup>16</sup> updated the

information about the GCS and recommended stimulating the nail

**We found a moderate level of agreement in GCS sum scores assessed by intensive care unit nurses and 2 independent researchers.**

bed, trapezius, and supraorbital site to record the best response. However, varying assessment techniques and inconsistent recording of GCS scores indicate a lack of standardization in clinical practice.<sup>17</sup> Because of the use of different locations for pain stimuli, the reliability of the GCS has been questioned.<sup>12</sup> Reith et al<sup>17</sup> reported that the most common pain stimuli used were nail bed pressure, trapezius pinch, finger pinch, sternal rub, earlobe stimulation, supraorbital nerve pressure,

and retromandibular stimulation. In another study, Reith et al<sup>18</sup> found that the level of agreement for motor response scores was sufficient and was higher than for other subcomponents of the GCS, similar to the findings of Teasdale et al.<sup>16</sup> Middleton<sup>19</sup> stated that in clinical practice the most preferred method of pain stimulation is the trapezius pinch. Waterhouse<sup>15</sup> indicated that only 47% of nurses used approved methods.

Our study found a substantial level of agreement between ICU nurses and the 2 researchers for motor response scores. The substantial (not near-perfect) level of agreement between the nurses and the researchers may be explained by the use of different or improper sites of pain stimulation. In our study, nurses preferred

**Nurses should receive appropriate education and skills through novel educational strategies such as high-fidelity simulation or objective structured clinical examinations with simulated patients.**

using the nail bed, trapezius, nipple, sole of the foot, earlobe, and supra-

orbital site. The researchers used the nail bed, trapezius, and suborbital sites, which are the preferred sites for painful stimuli suggested in the literature.<sup>16</sup> The results of this study may also be explained by confusion regarding normal and abnormal flexion responses when using different sites of pain stimulation.

Healey et al<sup>20</sup> found that motor score accuracy alone is better than total GCS score as a predictor of patient outcome. However, accurate predictions of mortality and patient outcome require a high level of agreement among observers. As previous studies also suggest,<sup>7,21</sup> we recommend eliminating confounding variables such as the use of different sites of pain stimuli and the scoring/evaluating of motor response, both of which may compromise nursing care and prediction of patient outcome.

### Verbal Response

Over the years, health care providers have used different methods of resolving conflicts in the scoring of verbal response. One of the greatest obstacles in the assessment of verbal response is endotracheal intubation.<sup>22-26</sup> New methods include assigning the lowest possible score to untestable components and pseudoscore missing values on the basis of testable features.<sup>24</sup> Our study found a substantial (not near-perfect) level of agreement among observers for patients' verbal responses,

possibly because of the challenges associated with assigning scores for intubated patients. Of the participating nurses, 16.8% assigned a score of 1 (none) to the verbal component for intubated patients, suggesting that nurses require further training in assessing this component for such patients. Similarly, Reith et al<sup>17</sup> found that 31% of nurses assigned a score of 1 to the verbal component for intubated patients.

A score of 1 is typically used to indicate an absence of response.<sup>17</sup> However, there is a significant difference between a valid score of 1 and a score of 1 assigned to an untestable patient.<sup>1</sup> Assigning a score of 1 to the verbal component may result in a lower GCS sum score, leading to poor patient outcomes.<sup>27</sup> Therefore, Teasdale et al<sup>16</sup> recommended assigning a value of V(tube) for verbal response in intubated patients or patients with a tracheostomy. They also discouraged assigning a score of 1 for verbal response in sedated and untestable patients. However, assigning a nonnumeric value for the verbal response of intubated patients may lead to inaccurate GCS sum scores. The resulting unreliable GCS scores may affect prognostication, treatment, and decision-making by health care providers.<sup>25</sup> In our study, we advised observers to evaluate nonsedated, intubated patients' verbal responses by having patients write or point to letters if they were able to obey commands. Health care providers need precise information to assign accurate values to the untestable verbal components for patients receiving mechanical ventilation. We also recommend discontinuing the use of the V(tube) assignment for intubated patients.

### Glasgow Sum Scores

To predict patient mortality and implement effective care intervention, each subcomponent score of the GCS should indicate an objective and accurate result concerning a patient's level of consciousness. The literature shows that significant correlation exists between a low GCS sum score and high mortality/poor prognosis.<sup>12</sup> Healey et al<sup>20</sup> identified 120 possible motor, verbal, and eye response combinations and noted that these scores combine into only 13 different GCS sum scores (scores of 3 through 15), which are associated with different mortality rates. The combination of motor score of 1, verbal score of 2, and eye response score of 1 is associated with a 28% mortality rate, whereas the combination of motor score of 2, verbal score of 1, and eye response score of 1 is associated with a 52% mortality rate. Studies have shown that a

patient's consciousness level is a predicting factor in the agreement of GCS scores.<sup>4,6,17,27-30</sup>

Our study found a borderline moderate level of agreement (62.4%) in GCS sum scores assessed by ICU nurses and the 2 independent researchers. Many studies have found excellent interrater reliability rates for patients with GCS scores of 13 to 15.<sup>31-34</sup> We found a moderate level of agreement in GCS scores for patients with GCS scores of 10 or less. Similarly, other studies have shown moderate or fair agreement for patients with GCS scores lower than 13.<sup>21,33</sup> Although such differences may be considered insignificant, their clinical importance depends on patient diagnosis, outcome, and severity of illness. These differences also affect patient triage and treatment decisions.<sup>2</sup>

Interobserver agreement for GCS scores has been reported to range from high<sup>3,6,32</sup> to low<sup>5</sup> among various types of health care providers. The factors that may have the most influence on GCS score reliability are level of experience,<sup>30,35-37</sup> especially with neurosurgical patients,<sup>6,7,16,21,30,38</sup> and educational qualifications of nurses.<sup>39,40</sup> Studies have shown that experienced nurses are more accurate in GCS assessment than are younger and more inexperienced nurses because the latter may have inadequate knowledge of the GCS.<sup>6,10,14,26,41</sup> Our study did not measure whether level of education or experience affects GCS assessment; however, most nurses had 1 to 2 years of experience in the ICU in which the study was conducted, and almost half of the nurses had 3 to 5 years of experience in the ICU nursing profession. Considering that most nurses in our study had only a few years of professional experience, the moderate level of agreement shows that less experienced nurses may face difficulties in evaluating patients with GCS deterioration.

Although agreement between the 2 researchers in our study was near perfect, the level of agreement among nurses and the 2 researchers was substantial. Intensive care unit nurses may lack theoretical knowledge and skills in assessing the GCS. The 2 researchers' high levels of experience and knowledge are likely reasons for their almost-perfect level of agreement.

Our study included only patients with neurological and neurosurgical diseases. Most patients' GCS scores were below 10 ( $n = 146$ ); we believe that pseudoscore was prevented because the assessment is easier in patients with GCS scores greater than 10. Another strength of this study is that each observer evaluated patients' GCS scores independently and within the designated time

frame. In our study, each observation was not allowed to exceed 5 minutes, preventing possible changes in patients' GCS scores. We believe that this study provided ICU nurses with constructive feedback and improved awareness and knowledge regarding the evaluation of motor response.

## Limitations

One limitation of this study was its use of convenience sampling with patient throughput. Because the study was conducted with 21 nurses working in only one 18-bed ICU, results should be cautiously interpreted. During data collection, nurses expressed doubts concerning their motor response assessments even though they were given the option of real-time use of a GCS reference card. Because they were aware that they were taking part in a study, nurses may have reviewed GCS assessment guidelines during data collection, which may have led to an improved level of agreement in motor response scores among the nurses and researchers. Another limitation is that we could not evaluate the link between GCS score accuracy and nurses' levels of knowledge and years of experience.

## Implications for Practice

Research indicates that standardization of assessment, in addition to knowledge and education, is extremely important in ensuring accuracy of assessment.<sup>9,10,42</sup> We found, however, that lack of knowledge and education regarding the standardized use of the GCS is still an issue for ICUs. To improve GCS evaluation, nurses should receive appropriate education and skills through novel educational strategies such as high-fidelity simulation or objective structured clinical examinations with simulated patients. Neurocritical care scenarios such as treating patients with head trauma or progressively deteriorating acute intracerebral hemorrhage create a learning environment that may lead to more reliable GCS assessment. Because of the variety of patients requiring GCS assessment, refresher training programs and practical workshops on neurological assessment should be organized regularly for more experienced nurses. Such training programs may help prevent inaccuracies in GCS assessment. Furthermore, frequent exposure to patients with a wide variety of neurosurgical or neurological diseases who require GCS assessment may facilitate effective training and standardization of assessment. More time spent on bedside GCS scoring in the presence of a preceptor nurse during



the first 6 months in the ICU might raise nurse awareness regarding the importance of GCS evaluation and its effect on patient prognosis.

## Conclusions

We argue that more consistent use of the GCS can be achieved in both research and daily practice. To establish a high level of interrater reliability in GCS scoring, particularly in the sum and verbal scores in ICU settings, further blinded studies should focus on standardized methods. We strongly advise ICU nurses to place importance not only on knowledge and education but also on skills acquired by novel educational strategies. We also advise nurses to use GCS reference cards during GCS scoring rather than relying on memory alone. [CCN](http://www.ccnonline.org)

Financial Disclosures  
None reported.

## See also

To learn more about caring for sedated patients, read “Stimulation of Critically Ill Patients: Relationship to Sedation” by Grap et al in the *American Journal of Critical Care*, 2016;25(3):e48-e55. Available at [www.ajconline.org](http://www.ajconline.org).

## References

- Teasdale G. Forty years on: updating the Glasgow Coma Scale. *Nurs Times*. 2014;110(42):12-16.
- Chou R, Totten AM, Carney N, et al. Predictive utility of the total Glasgow Coma Scale versus the motor component of the Glasgow Coma Scale for identification of patients with serious traumatic injuries. *Ann Emerg Med*. 2017;70(2):143-157.e6.
- Bledsoe BE, Casey MJ, Feldman J, et al. Glasgow Coma Scale scoring is often inaccurate. *Prehosp Disaster Med*. 2015;30(1):46-53.
- Feldman A, Hart KW, Lindsell CJ, McMullan JT. Randomized controlled trial of a scoring aid to improve Glasgow Coma Scale scoring by emergency medical services providers. *Ann Emerg Med*. 2015;65(3):325-329.e2. doi:10.1016/j.annemergmed.2014.07.454
- Gill MR, Reiley DG, Green SM. Interrater reliability of Glasgow Coma Scale scores in the emergency department. *Ann Emerg Med*. 2004;43(2):215-223.
- Holdgate A, Ching N, Angonese L. Variability in agreement between physicians and nurses when measuring the Glasgow Coma Scale in the emergency department limits its clinical usefulness. *Emerg Med Australas*. 2006;18(4):379-384.
- Heron R, Davie A, Gillies R, Courtney M. Interrater reliability of the Glasgow Coma Scale scoring among nurses in sub-specialties of critical care. *Aust Crit Care*. 2001;14(3):100-105.
- Prasad K. The Glasgow Coma Scale: a critical appraisal of its clinimetric properties. *J Clin Epidemiol*. 1996;49(7):755-763.
- Riechers RG 2nd, Ramage A, Brown W, et al. Physician knowledge of the Glasgow Coma Scale. *J Neurotrauma*. 2005;22(11):1327-1334.
- Mattar I, Liaw SY, Chan MF. A study to explore nurses' knowledge in using the Glasgow Coma Scale in an acute care hospital. *J Neurosci Nurs*. 2013;45(5):272-280.
- von Elm E, Altman DG, Egger M, et al. The Strengthening of Reporting of Observational Studies in Epidemiology (STROBE) statement: guidelines for reporting observational studies. *Lancet*. 2007;370(9596):1453-1457.
- Braine ME, Cook N. The Glasgow Coma Scale and evidence-informed practice: a critical review of where we are and where we need to be. *J Clin Nurs*. 2017;26(1-2):280-293.
- Majerus S, Gill-Thwaites H, Andrews K, Laureys S. Behavioral evaluation of consciousness in severe brain damage. *Prog Brain Res*. 2005;150:397-413.
- Jaddoua BA, Mohammed WK, Abbas AD. Assessment of nurse's knowledge concerning Glasgow Coma Scale in neuro surgical wards. *Kufa J Nurs Sci*. 2013;3(2). <https://www.iasj.net/iasj?func=article&id=79447>
- Waterhouse C. An audit of nurses' conduct and recording of observations using the Glasgow Coma Scale. *Br J Neurosci Nurs*. 2008;4(10):492-499.
- Teasdale G, Maas A, Lecky F, Manley G, Stocchetti N, Murray G. The Glasgow Coma Scale at 40 years: standing the test of time. *Lancet Neurol*. 2014;13(8):844-854. Published correction appears in *Lancet Neurol*. 2014;13(9):863.
- Reith FC, Van den Brande R, Synnot A, Gruen R, Maas AI. The reliability of the Glasgow Coma Scale: a systematic review. *Intensive Care Med*. 2016;42(1):3-15.
- Reith FC, Brennan PM, Maas AI, Teasdale GM. Lack of standardization in the use of the Glasgow Coma Scale: results of international surveys. *J Neurotrauma*. 2016;33(1):89-94.
- Middleton PM. Practical use of the Glasgow Coma Scale; a comprehensive narrative review of GCS methodology. *Australas Emerg Nurs J*. 2012;15(3):170-183.
- Healey C, Osler TM, Rogers FB, et al. Improving the Glasgow Coma Scale score: motor score alone is a better predictor. *J Trauma*. 2003;54(4):671-680.
- Menegazzi JJ, Davis EA, Sucov AN, Paris PM. Reliability of the Glasgow Coma Scale when used by emergency physicians and paramedics. *J Trauma*. 1993;34(1):46-48.
- Ellis A, Cavanagh SJ. Aspects of neurosurgical assessment using the Glasgow Coma Scale. *Intensive Crit Care Nurs*. 1992;8(2):94-99.
- Lieh-Lai MW, Theodorou AA, Sarnaik AP, Meert KL, Moylan PM, Canady AI. Limitations of the Glasgow Coma Scale in predicting outcome in children with traumatic brain injury. *J Pediatr*. 1992;120(2 pt 1):195-199.
- Rutledge R, Lentz CW, Fakhry S, Hunt J. Appropriate use of the Glasgow Coma Scale in intubated patients: a linear regression prediction of the Glasgow verbal score from the Glasgow eye and motor scores. *J Trauma*. 1996;41(3):514-522.
- Cheng K, Bassil R, Carandang R, Hall W, Muehlschlegel S. The estimated verbal GCS subscore in intubated traumatic brain injury patients: is it really better? *J Neurotrauma*. 2017;34(8):1603-1609.
- Gabbe BJ, Cameron PA, Finch CF. The status of the Glasgow Coma Scale. *Emerg Med (Fremantle)*. 2003;15(4):353-360.
- Stead LG, Wijdicks EF, Bhagra A, et al. Validation of a new coma scale, the FOUR score, in the emergency department. *Neurocrit Care*. 2009;10(1):50-54.
- Winship C, Williams B, Boyle MJ. Should an alternative to the Glasgow Coma Scale be taught to paramedic students? *Emerg Med J*. 2013;30(3): e19.
- Wijdicks EF, Bamlet WR, Maramattom BV, Manno EM, McClelland RL. Validation of a new coma scale: the FOUR score. *Ann Neurol*. 2005;58(4):585-593.
- Wolf CA, Wijdicks EF, Bamlet WR, McClelland RL. Further validation of the FOUR score coma scale by intensive care nurses. *Mayo Clin Proc*. 2007;82(4):435-438.
- Gorelick MH, Atabaki SM, Hoyle J, et al. Interobserver agreement in assessment of clinical variables in children with blunt head trauma. *Acad Emerg Med*. 2008;15(9):812-818.
- Heard K, Bebartta VS. Reliability of the Glasgow Coma Scale for the emergency department evaluation of poisoned patients. *Hum Exp Toxicol*. 2004;23(4):197-200.
- Kerby JD, MacLennan PA, Burton JN, McGwin G Jr, Rue LW 3rd. Agreement between prehospital and emergency department Glasgow Coma Scores. *J Trauma*. 2007;63(5):1026-1031.
- Stiell IG, Wells GA, Vandemheen K, et al. The Canadian CT Head Rule for patients with minor head injury. *Lancet*. 2001;357(9266):1391-1396.
- Akavipat P. Endorsement of the FOUR score for consciousness assessment in neurosurgical patients. *Neurol Med Chir (Tokyo)*. 2009;49(12):565-571.
- Crossman J, Bankes M, Bhan A, Crockard HA. The Glasgow Coma Scale: reliable evidence? *Injury*. 1998;29(6):435-437.
- Kevric J, Jelinek GA, Knott J, Weiland TJ. Validation of the Full Outline of Unresponsiveness (FOUR) Scale for conscious state in the emergency department: comparison against the Glasgow Coma Scale. *Emerg Med J*. 2011;28(6):486-490.
- Rowley G, Fielding K. Reliability and accuracy of the Glasgow Coma Scale with experienced and inexperienced users. *Lancet*. 1991;337(8740):535-538.
- Baker M. Reviewing the application of the Glasgow Coma Scale: does it have interrater reliability? *Br J Neurosci Nurs*. 2008;4(7):342-347.
- Lane PL, Báez AA, Brabson T, Burmeister DD, Kelly JJ. Effectiveness of a Glasgow Coma Scale instructional video for EMS providers. *Prehosp Disaster Med*. 2002;17(3):142-146.
- Shoqirat N. Nursing students' understanding of the Glasgow Coma Scale. *Nurs Stand*. 2006;20(30):41-47.
- McLernon S. The Glasgow Coma Scale 40 years on: a review of its practical use. *Br J Neurosci Nurs*. 2014;10(4):179-184.
